# Supplementary material
Source: PubMed Central journal article supplement (PMC4384830)
Supplement: sb500233u_si_001.pdf [file sb500233u_si_001.pdf]

## Supporting Information for:

*Cooperativity to increase Turing pattern space for synthetic biology.*

Luis Diambra, Vivek Raj Senthivel, Diego Barcena, and Mark Isalan

### Supplementary figures

$$f(a, h) = \frac{a^n}{(1 + (h/k_h)^m)(1 + (a/k_a)^n)}$$

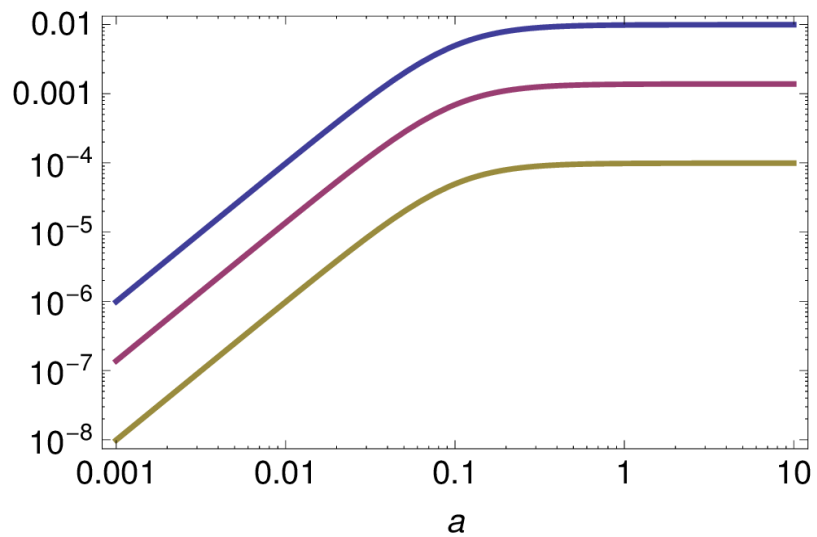

**Fig S1: Alternative regulatory function.** The plots shows the behaviours of an alternative regulatory function, where the inhibitor blocks the activation pathway, decreasing the effective production rates, for three different concentrations of inhibitor  $h$ : 0.01 (blue), 0.25 (red), 1.0 (brown).  $n = 2$ ,  $k_a = k_h = 0.1$ .

```

input[x_] := 0.01 * Exp[-(x - 50)^2 / 0.5];
funx5 = 0.9060676820636298; funy5 = 1.1325846025795372;
(* funx5 and funy5 were obtained by solving:
NSolve[{x^n+y^n-cai x^(n-1)=-1,y==chi x/(cai ui)},{x,y},Reals],
with n=6;chi=6;cai=6.;ui=.8; and taking the first solution *)
ui = 0.8; di = 0.75; cai = 6; chi = 6; n = 6;
cur15 = NDSolve[{
  D[u[t, x], t] == di D[u[t, x], x, x] +
    cai u[t, x]^n / (1 + u[t, x]^n + v[t, x]^n) - u[t, x], D[v[t, x], t] ==
  D[v[t, x], x, x] + chi u[t, x]^n / (1 + u[t, x]^n + v[t, x]^n) - ui v[t, x],
  u[0, x] == funx5 + input[x], v[0, x] == funy5, u[t, 0] == u[t, 100],
  v[t, 0] == v[t, 100]}, {u, v}, {t, 0, 50}, {x, 0, 100}, MaxStepSize -> 0.005];
Plot3D[Evaluate[u[t, x] /. cur15[[1, 1]]], {t, 0, 50}, {x, 0, 100},
  MaxRecursion -> 5, AxesLabel -> {Style["Time", FontFamily -> "Helvetica", Italic, 22],
  Style[Rotate["Space", 60 Degree], FontFamily -> "Helvetica", Italic, 22],
  Style["a", FontFamily -> "Times", Italic, 22]}, BoxStyle -> Thickness[0.0025],
  PlotStyle -> Directive[Specularity[Yellow, 30], Opacity[0.9], Orange],
  PlotRange -> All, LabelStyle -> Directive[FontFamily -> "Helvetica", 16],
  PlotPoints -> 40, ImageSize -> 600, Mesh -> None]

```

**Code** Mathematica code and values of parameters used to obtain the 3D surface displayed in Fig. 8B. You will need a Wolfram Mathematica kernel to run the code (<http://www.wolfram.com/mathematica/>).
